# Supplementary material for: A Targeted Computational Screen of the SWEETLEAD Database Reveals FDA-Approved Compounds with Anti-Dengue Viral Activity
Source: PubMed Central journal article supplement (PMC7667029; doi:10.1128/mbio.02839-20), 2020-11-10
Supplement: mBio.02839-20-sf002.pdf [file mBio.02839-20-sf002.pdf]

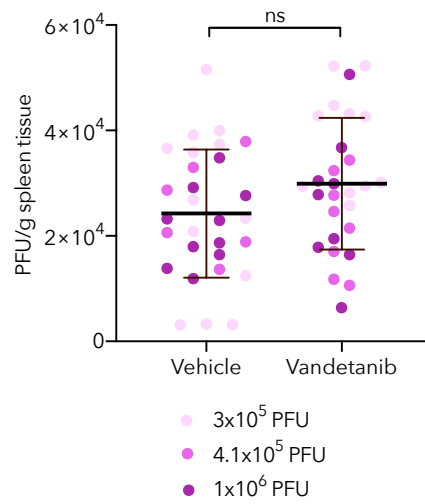

**Fig S2: Vandetanib treatment in dengue-infected mice did not affect splenic titers.** AGB6 mice were infected with  $3 \times 10^5$  (light pink),  $4.1 \times 10^5$  (magenta), or  $1 \times 10^6$  (purple) PFU dengue virus. Mice were treated twice daily with 15 mg/kg (30 mg/kg per day) vandetanib or drug vehicle alone, beginning 4 h prior to infection. Splenic titer at 4 days post-infection is shown. Data were analyzed by two-tailed, unpaired t-test.
