# Supplementary material for: A Targeted Computational Screen of the SWEETLEAD Database Reveals FDA-Approved Compounds with Anti-Dengue Viral Activity
Source: PubMed Central journal article supplement (PMC7667029; doi:10.1128/mbio.02839-20), 2020-11-10
Supplement: mBio.02839-20-st001.pdf [file mBio.02839-20-st001.pdf]

| Lead Compound | Hit Compound    | Antiviral | Toxicity | Tanimoto Combo |
|---------------|-----------------|-----------|----------|----------------|
| ARDP0006      | Methoxsalen     | -         | -        | 0.959          |
|               | Triamterine     | +++       | +++      | 0.826          |
|               | Hydroxy tacrine | -         | -        | 1.001          |
|               | Sulfisoxazole   | +         | +        | 0.830          |
|               | Pemirolast      | -         | -        | 0.875          |
|               | Pyrimethamine   | +++       | -        | 0.808          |
| ST-148        | Ondansetron     | ++        | -        | 0.843          |
|               | Nifedazone      | +         | +        | 0.950          |
|               | Eltrombopag     | -         | -        | 0.926          |
|               | Meloxicam       | -         | +        | 0.972          |
|               | Doxazosin       | +         | +++      | 0.903          |
|               | Omeprazole      | -         | +        | 0.892          |
|               | Niclosamide     | +++       | -        | 1.002          |
| Spautin-1     | Vandetanib      | ++        | -        | 0.914          |

**Table S1. Summary of hits for lead compounds ARDP0006 and ST-148 screened for anti-dengue activity in tissue culture cells.** Hit compounds were tested for anti-dengue activity and cell toxicity in tissue culture cell lines. Antiviral activity is summarized as: (-) not antiviral, with titer greater than 50% of vehicle; (+) weakly antiviral, with titer between 20-50% of vehicle; (++) moderately antiviral, with titer between 5-20% of vehicle; and (+++) highly antiviral, with titer less than 5% of vehicle. Toxicity at these doses are represented as: (-) nontoxic, with cell viability greater than 80% of vehicle; (+) mild toxicity, with cell viability between 60-80% of vehicle; and (+++) high toxicity, with as cell viability less than 60% of vehicle. Data summarized here are depicted graphically in Figs S1, 2C, 3C, and 4C. The Tanimoto combo score of each hit during initial ROCS screening is indicated; higher Tanimoto combo scores are indicative of increased chemical similarity.
